# Supplementary material
Source: PubMed Central journal article supplement (PMC2290773)
Supplement: pnas_0708058105_11.pdf [file pnas_0708058105_11.pdf]

**Table 1. Estimated rates for the processes discussed in the text**

| process    | base | direction | $\mathbf{V}_R$ |     | $\mathbf{V}$ |      | $\mathbf{D}$ |     | $\mathbf{e}$          | $\Delta$ | $k$                   |
|------------|------|-----------|----------------|-----|--------------|------|--------------|-----|-----------------------|----------|-----------------------|
| unstacking | mGua | forward   | 12.4           | 0.8 | -10.8        | 4.8  | 0.4          | 0   | $0.997d_1 - 0.074d_2$ | 2.6      | $3.0 \times 10^{-3}$  |
|            |      |           | 0.8            | 2.3 | 4.8          | 20.8 | 0            | 1.0 |                       |          |                       |
| unstacking | mGua | backward  | 20.7           | 1.6 | -10.8        | 4.8  | 0.4          | 0   | $0.997d_1 - 0.074d_2$ | 8.4      | $6.3 \times 10^{-7}$  |
|            |      |           | 1.6            | 1.7 | 4.8          | 20.8 | 0            | 1.0 |                       |          |                       |
| unstacking | Gua  | forward   | 14.5           | 1.7 | -15.5        | 2.7  | 0.4          | 0   | $0.991d_1 - 0.131d_2$ | 2.2      | $2.5 \times 10^{-2}$  |
|            |      |           | 1.7            | 4.7 | 2.7          | 1.7  | 0            | 0.9 |                       |          |                       |
| unstacking | Gua  | backward  | 18.2           | 0.2 | -15.5        | 2.7  | 0.4          | 0   | $0.991d_1 - 0.131d_2$ | 8.5      | $7.2 \times 10^{-7}$  |
|            |      |           | 0.2            | 1.9 | 2.7          | 1.7  | 0            | 0.9 |                       |          |                       |
| insertion  | mGua | forward   | 4.4            | 0.1 | -14.0        | -0.3 | 0.4          | 0   | $0.999d_5 + 0.015d_4$ | 1.1      | $1.4 \times 10^{-1}$  |
|            |      |           | 0.1            | 4.8 | -0.3         | 3.0  | 0            | 0.4 |                       |          |                       |
| insertion  | mGua | backward  | 10.6           | 1.3 | -14.0        | -0.3 | 0.4          | 0   | $0.999d_5 + 0.015d_4$ | 16.3     | $1.2 \times 10^{-12}$ |
|            |      |           | 1.3            | 3.3 | -0.3         | 3.0  | 0            | 0.4 |                       |          |                       |
| insertion  | Gua  | forward   | 4.4            | 0.5 | -14.5        | 0.1  | 0.1          | 0   | $0.999d_5 - 0.002d_4$ | 7.0      | $1.1 \times 10^{-6}$  |
|            |      |           | 0.5            | 3.6 | 0.1          | 4.3  | 0            | 1.0 |                       |          |                       |
| insertion  | Gua  | backward  | 7.6            | 1.1 | -14.5        | 0.1  | 0.1          | 0   | $0.999d_5 - 0.002d_4$ | 17.0     | $7.6 \times 10^{-14}$ |
|            |      |           | 1.1            | 3.2 | 0.1          | 4.3  | 0            | 1.0 |                       |          |                       |

$\mathbf{V}_R$  and  $\mathbf{V}$  are in  $\text{\AA}^{-2}$ ,  $\mathbf{D}$  is in  $\text{\AA}^2 \text{ps}^{-1}$ ,  $\Delta$  is in  $\text{kcal mol}^{-1}$ , and  $k$  is in  $\text{ps}^{-1}$ . For the active-site ‘‘insertion’’ steps, the ordering of coordinates in the matrices is  $d_5$  first and  $d_4$  second since  $d_5$  substitutes for  $d_3$  identified for mGua (see main text).
