# Supplementary material
Source: PubMed Central journal article supplement (PMC2290773)
Supplement: pnas_0708058105_12.pdf [file pnas_0708058105_12.pdf]

**Table 2. Scale factors  $s$  for the charges of ionic groups in the reservoir region for the unstacking step**

| residue | $s$    | residue | $s$    |
|---------|--------|---------|--------|
| Glu6    | 0.0508 | Lys8    | 0.0135 |
| Arg9    | 0.1053 | Asp13   | 0.0176 |
| Lys18   | 0.0202 | Glu21   | 0.0688 |
| Glu25   | 0.0129 | Lys36   | 0.0165 |
| Asp42   | 0.0124 | Glu45   | 0.0117 |
| Glu57   | 0.0136 | Glu74   | 0.0182 |
| Glu77   | 0.1664 | Glu78   | 0.0127 |
| Arg175  | 0.0637 | Cyt2    | 0.0601 |
| Cyt3    | 0.0505 | Ade4    | 0.1337 |
| Thy12   | 0.0502 | Ade13   | 0.0178 |
| Ade15   | 0.0862 | Cyt16   | 0.0939 |
| Thy17   | 0.1098 | Ade18   | 0.0938 |
| Gua19   | 0.1453 | Cyt26   | 0.0639 |
| Sod1    | 0.0175 | Sod2    | 0.0126 |
| Sod3    | 0.0554 | Sod10   | 0.0274 |
| Sod11   | 0.0172 | Sod12   | 0.0125 |
| Sod14   | 0.0876 | Sod16   | 0.0127 |
| Sod17   | 0.0299 | Sod18   | 0.0125 |
| Sod24   | 0.1079 |         |        |

Each scale factor is the ratio of the potential at the origin from a specific residue in vacuum ( $\epsilon = 1$ ) and that in aqueous solution ( $\epsilon = 1$  for the protein and  $\epsilon = 80$  for the solution). The origin was taken to be the  $C_\alpha$  atom of Gly131.
