# Supplementary material
Source: PubMed Central journal article supplement (PMC2290773)
Supplement: pnas_0708058105_13.pdf [file pnas_0708058105_13.pdf]

**Table 3. Scale factors  $s$  for the charges of ionic groups in the reservoir region for the active-site step**

| residue | $s$    | residue | $s$    |
|---------|--------|---------|--------|
| Glu6    | 0.0372 | Lys8    | 0.0126 |
| Arg9    | 0.1049 | Asp13   | 0.0357 |
| Lys18   | 0.0535 | Glu21   | 0.0959 |
| Glu25   | 0.0117 | Lys36   | 0.0649 |
| Asp42   | 0.0153 | Glu45   | 0.0132 |
| Glu57   | 0.0124 | Glu74   | 0.0251 |
| Glu77   | 0.0679 | Glu78   | 0.0123 |
| Glu92   | 0.0517 | Arg96   | 0.0538 |
| Lys101  | 0.0581 | Lys104  | 0.0243 |
| Lys107  | 0.0466 | Lys125  | 0.0623 |
| Cyt2    | 0.0143 | Cyt3    | 0.0209 |
| Ade4    | 0.0893 | Gua11   | 0.1260 |
| Thy12   | 0.0404 | Ade13   | 0.0233 |
| Ade18   | 0.1255 | Gua19   | 0.0765 |
| Cyt20   | 0.0817 | Cyt26   | 0.0523 |
| Sod1    | 0.0128 | Sod2    | 0.0127 |
| Sod3    | 0.0313 | Sod10   | 0.0262 |
| Sod11   | 0.0127 | Sod12   | 0.0125 |
| Sod16   | 0.0511 | Sod17   | 0.0155 |
| Sod18   | 0.0138 | Sod19   | 0.0176 |
| Sod20   | 0.0213 | Sod21   | 0.1335 |
| Sod22   | 0.1190 | Sod24   | 0.0130 |

The origin was taken to be the midpoint between the amide hydrogen atom and  $C_{\beta}$  of Asn157.
