# Supplementary material
Source: PubMed Central journal article supplement (PMC2290773)
Supplement: pnas_0708058105_14.pdf [file pnas_0708058105_14.pdf]

**Table 4. Bias annealing for the unstacking step**

| $k_{a_1}$ | $k_{a_2}$ | $k_s$ | $L$ | $n$ | $a$  |
|-----------|-----------|-------|-----|-----|------|
| 1000.0    | 1000.0    | 100.0 | 15  | 10  | 0.60 |
| 400.0     | 400.0     | 50.0  | 20  | 20  | 0.60 |
| 200.0     | 200.0     | 20.0  | 25  | 20  | 0.40 |
| 100.0     | 100.0     | 15.0  | 30  | 20  | 0.40 |
| 50.0      | 50.0      | 10.0  | 40  | 20  | 0.30 |
| 0.0       | 0.0       | 0.0   | 60  | 30  | 0.10 |

Trajectories of  $L$  ps were generated with biasing force constants  $k_{a_1}$ ,  $k_{a_2}$  in kcal mol<sup>-1</sup> rad<sup>-2</sup>, and  $k_s$  in kcal mol<sup>-1</sup> Å<sup>-2</sup>.  $n$  is the total number of paths shot and  $a$  is the acceptance rate.
