# Supplementary material
Source: PubMed Central journal article supplement (PMC2290773)
Supplement: pnas_0708058105_15.pdf [file pnas_0708058105_15.pdf]

**Table 5. Bias annealing for the active-site entry step**

| $k$    | $L$ | $n$ | $a$  |
|--------|-----|-----|------|
| 1000.0 | 32  | 10  | 0.60 |
| 500.0  | 32  | 10  | 0.80 |
| 300.0  | 50  | 10  | 1.00 |
| 150.0  | 50  | 10  | 0.90 |
| 100.0  | 50  | 20  | 0.50 |
| 50.0   | 50  | 20  | 0.30 |
| 30.0   | 50  | 40  | 0.25 |
| 15.0   | 60  | 30  | 0.20 |
| 0.0    | 80  | 20  | 0.10 |

$L$ ,  $n$  and  $a$  are the same as in SI Table 4.
