# Supplementary material
Source: PubMed Central journal article supplement (PMC2290773)

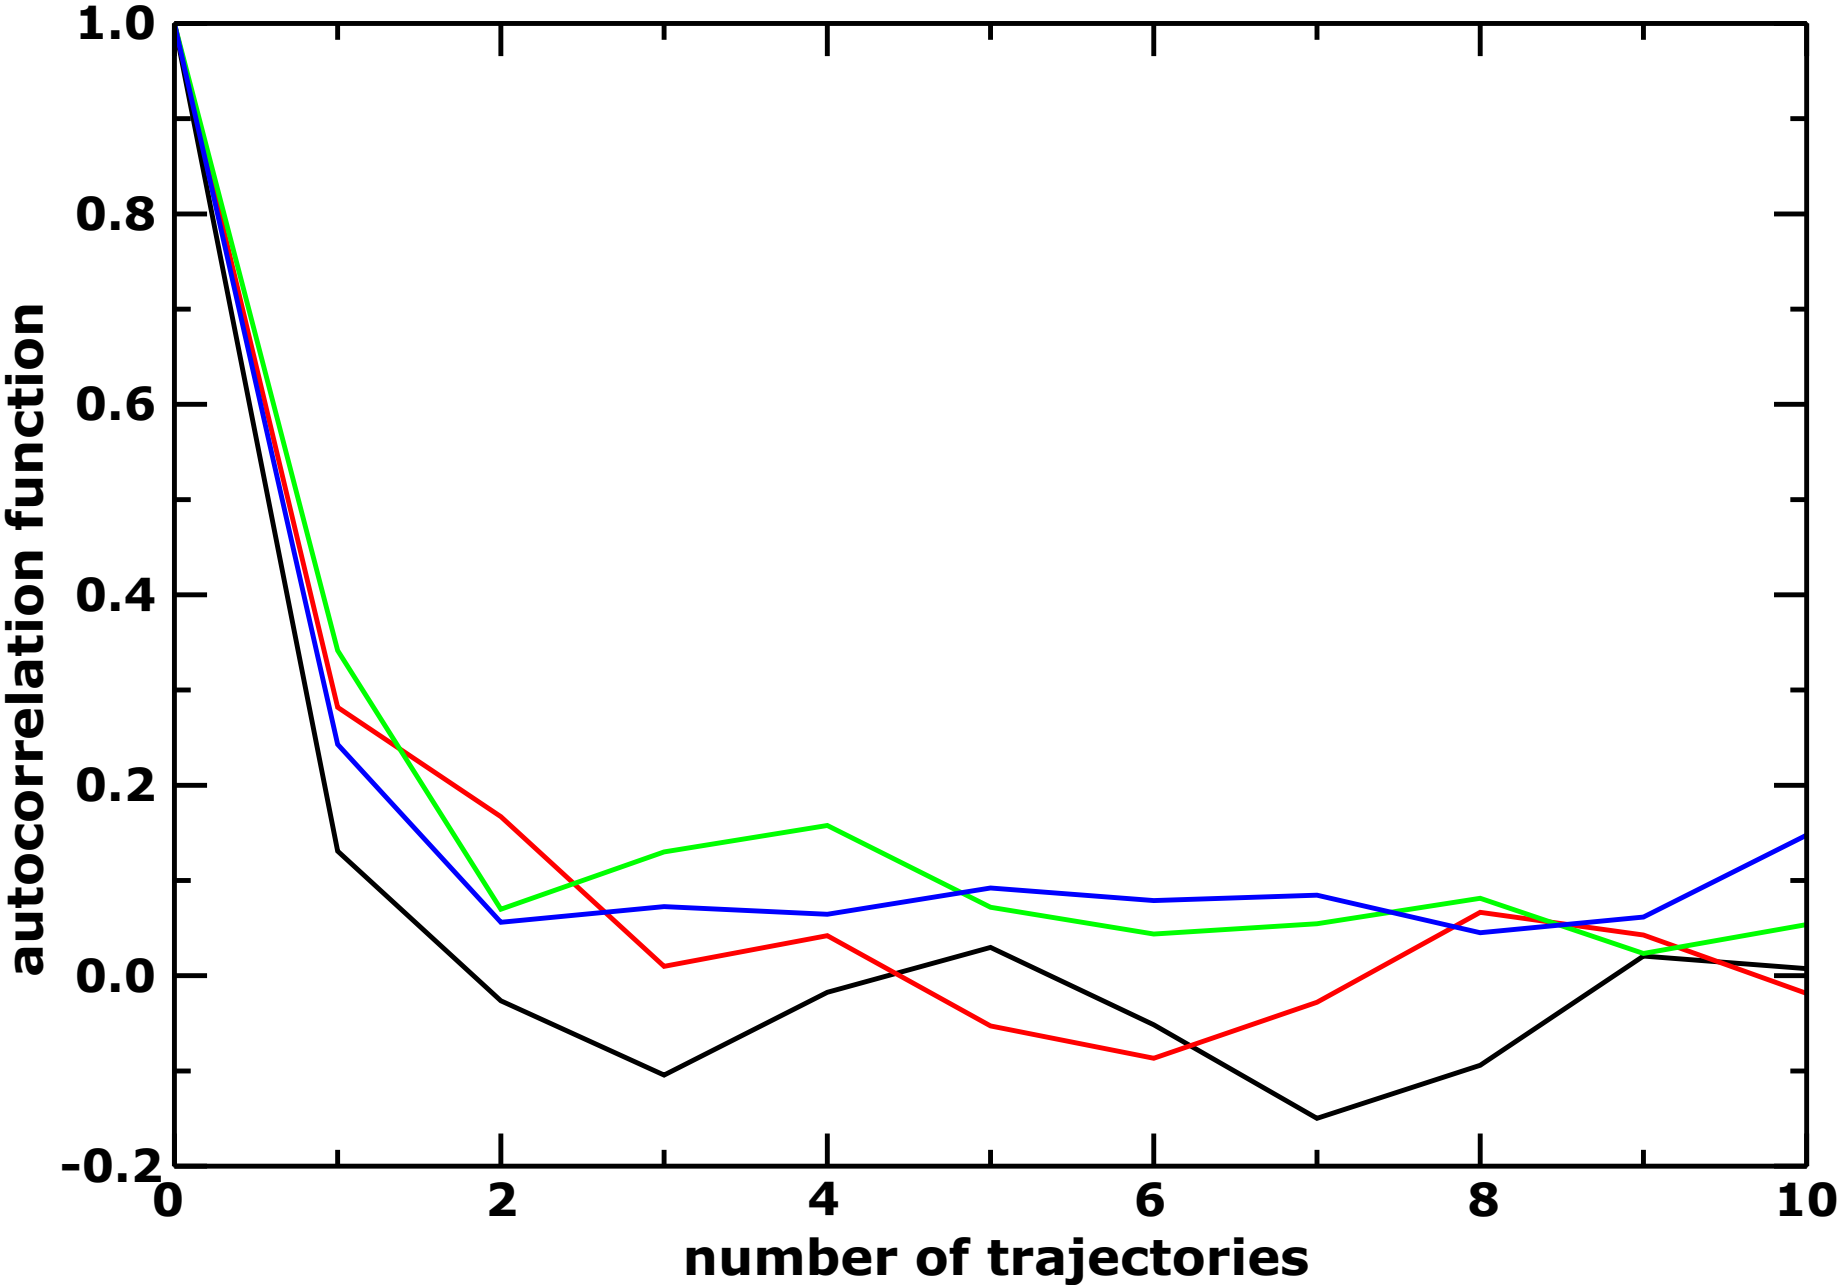

Supplement: pnas_0708058105_1.pdf [file pnas_0708058105_1.pdf]

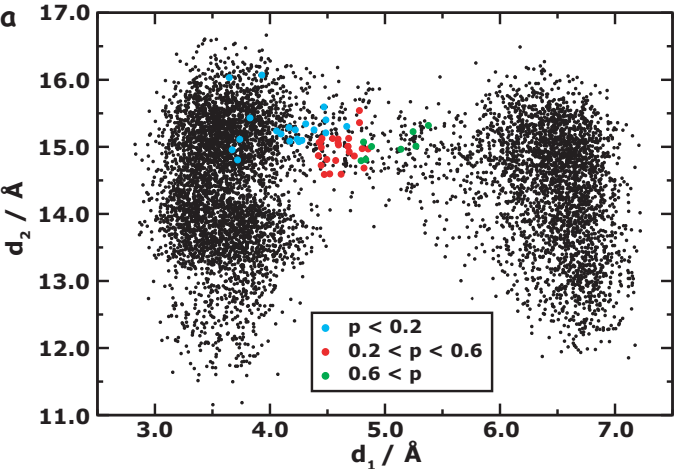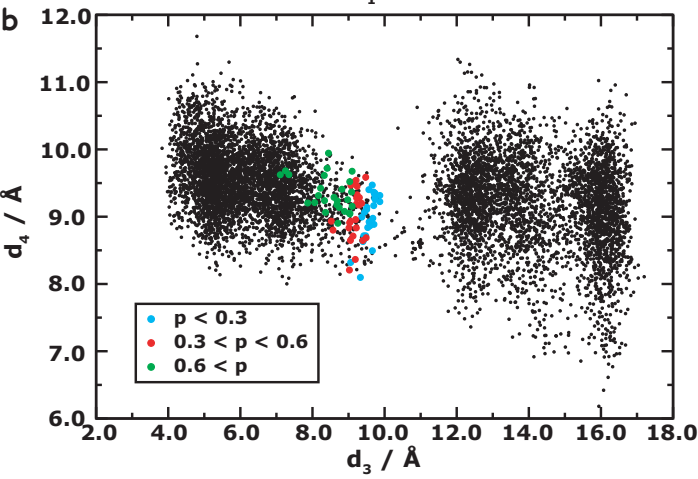

Supplement: pnas_0708058105_2.pdf [file pnas_0708058105_2.pdf]

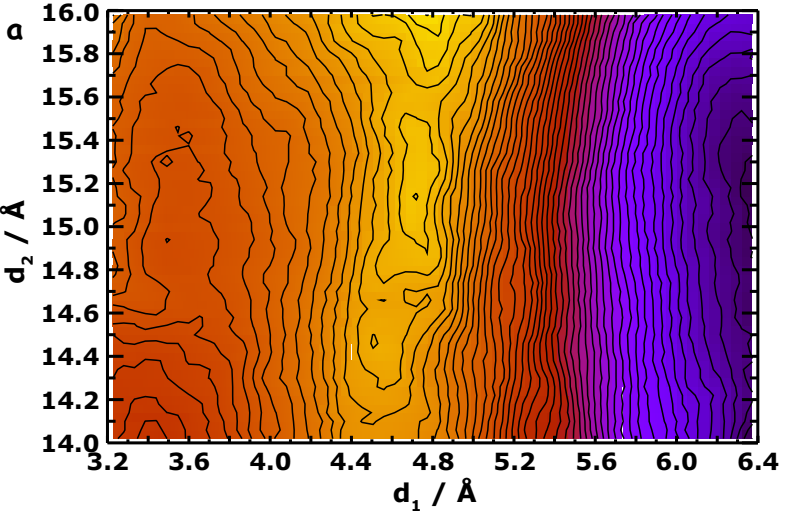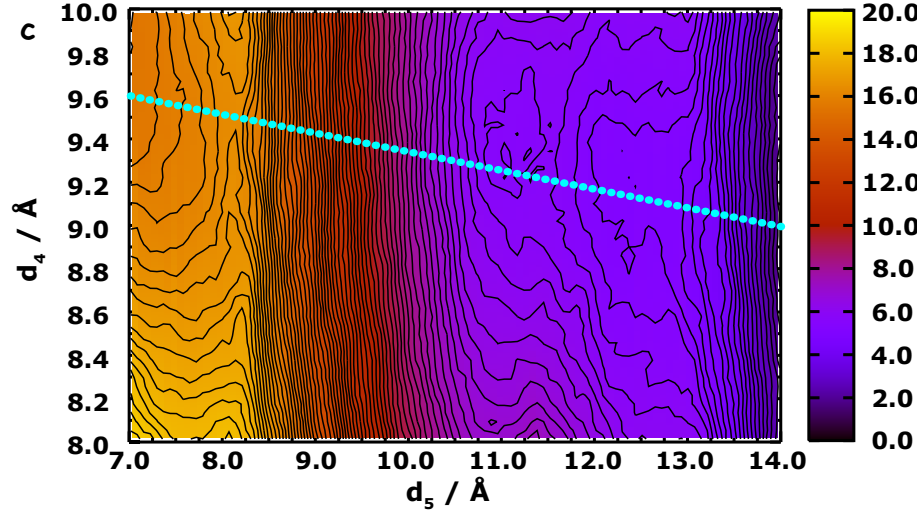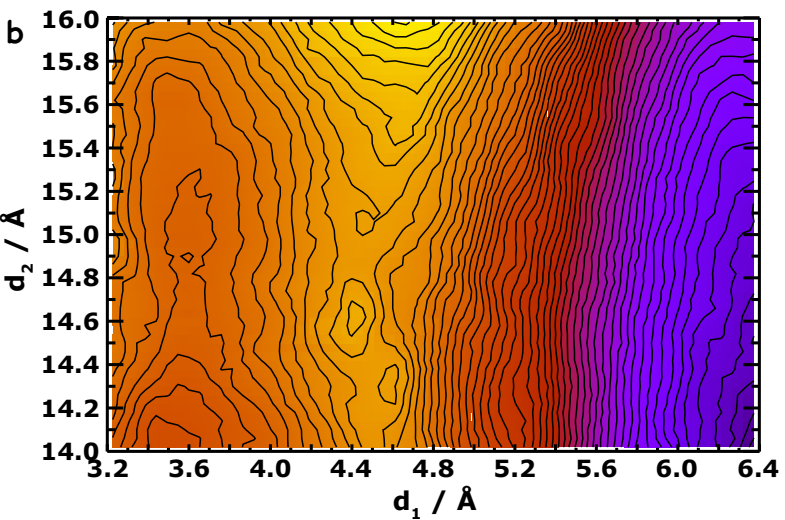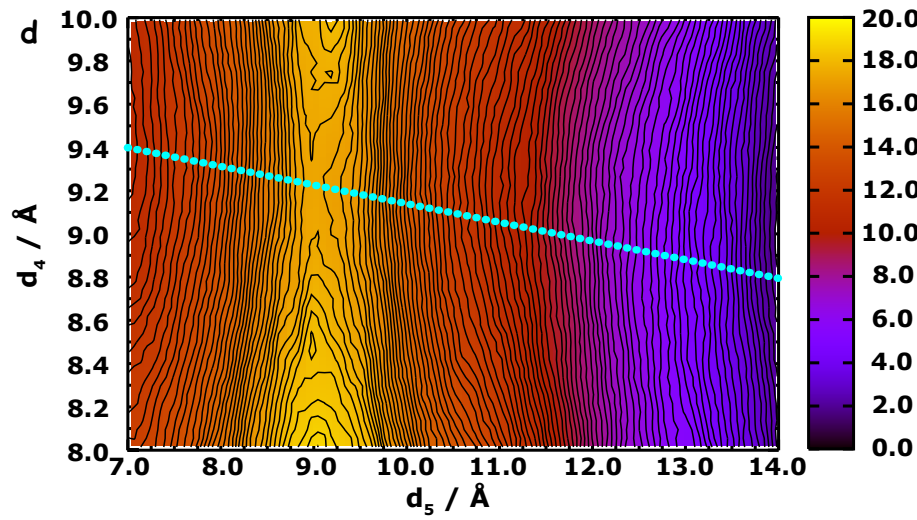

Supplement: pnas_0708058105_3.pdf [file pnas_0708058105_3.pdf]

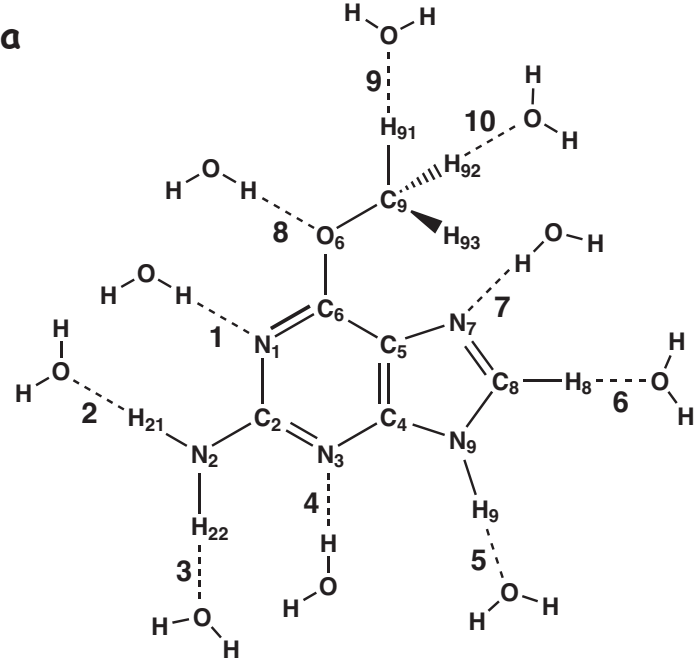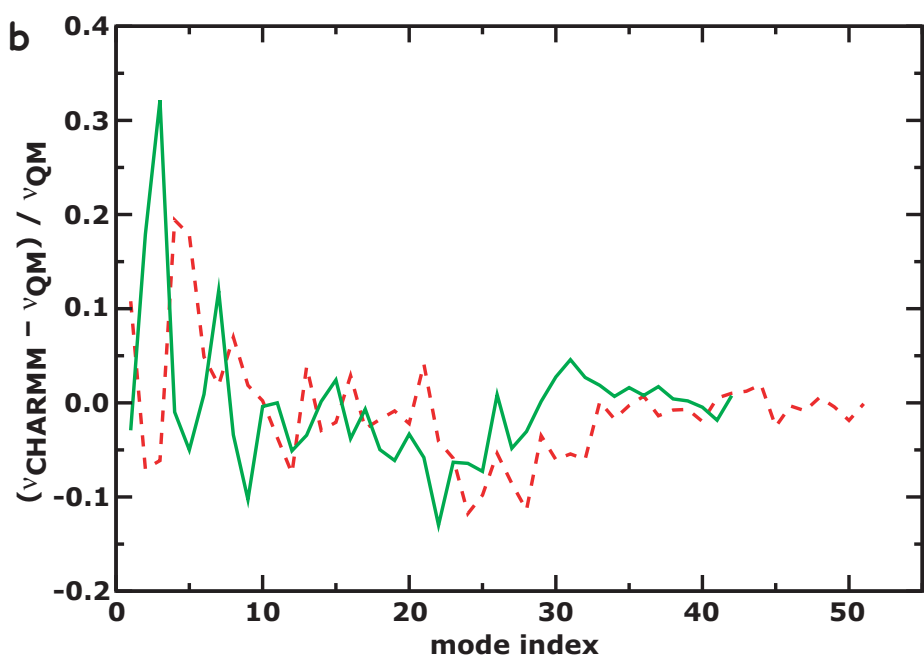

Supplement: pnas_0708058105_5.pdf [file pnas_0708058105_5.pdf]

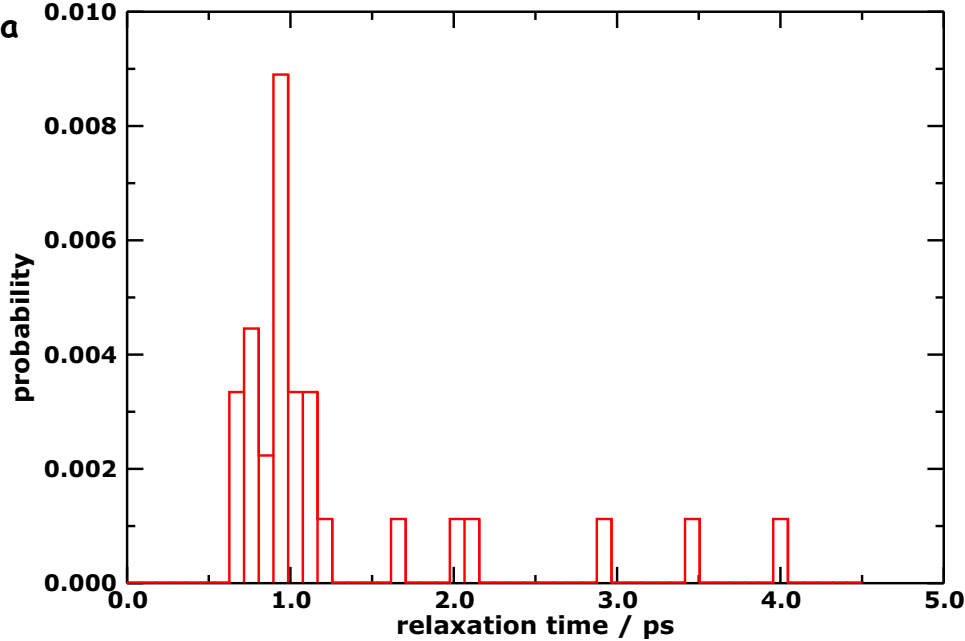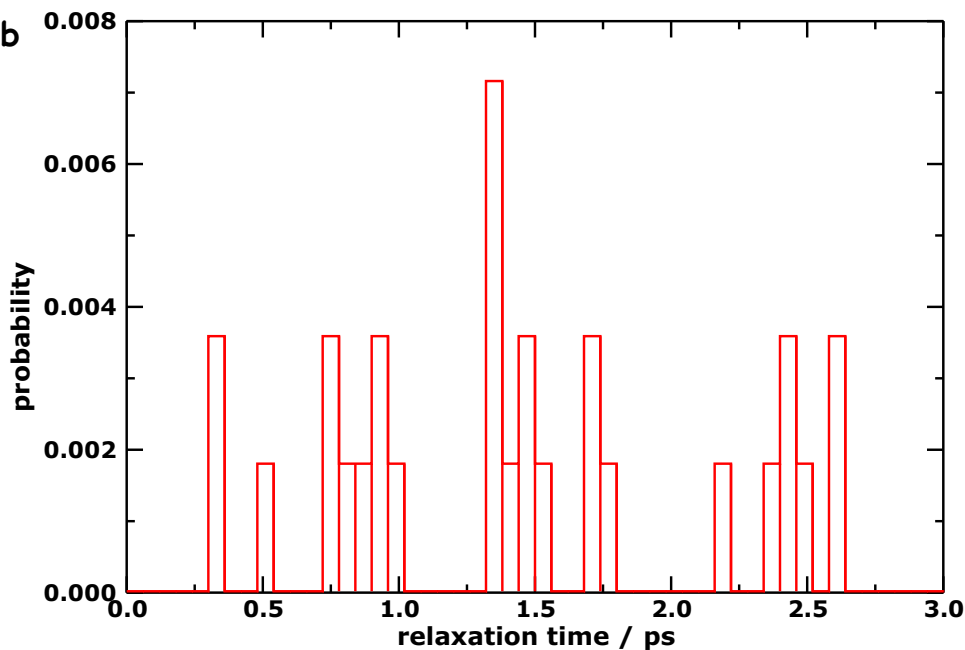

Supplement: pnas_0708058105_6.pdf [file pnas_0708058105_6.pdf]

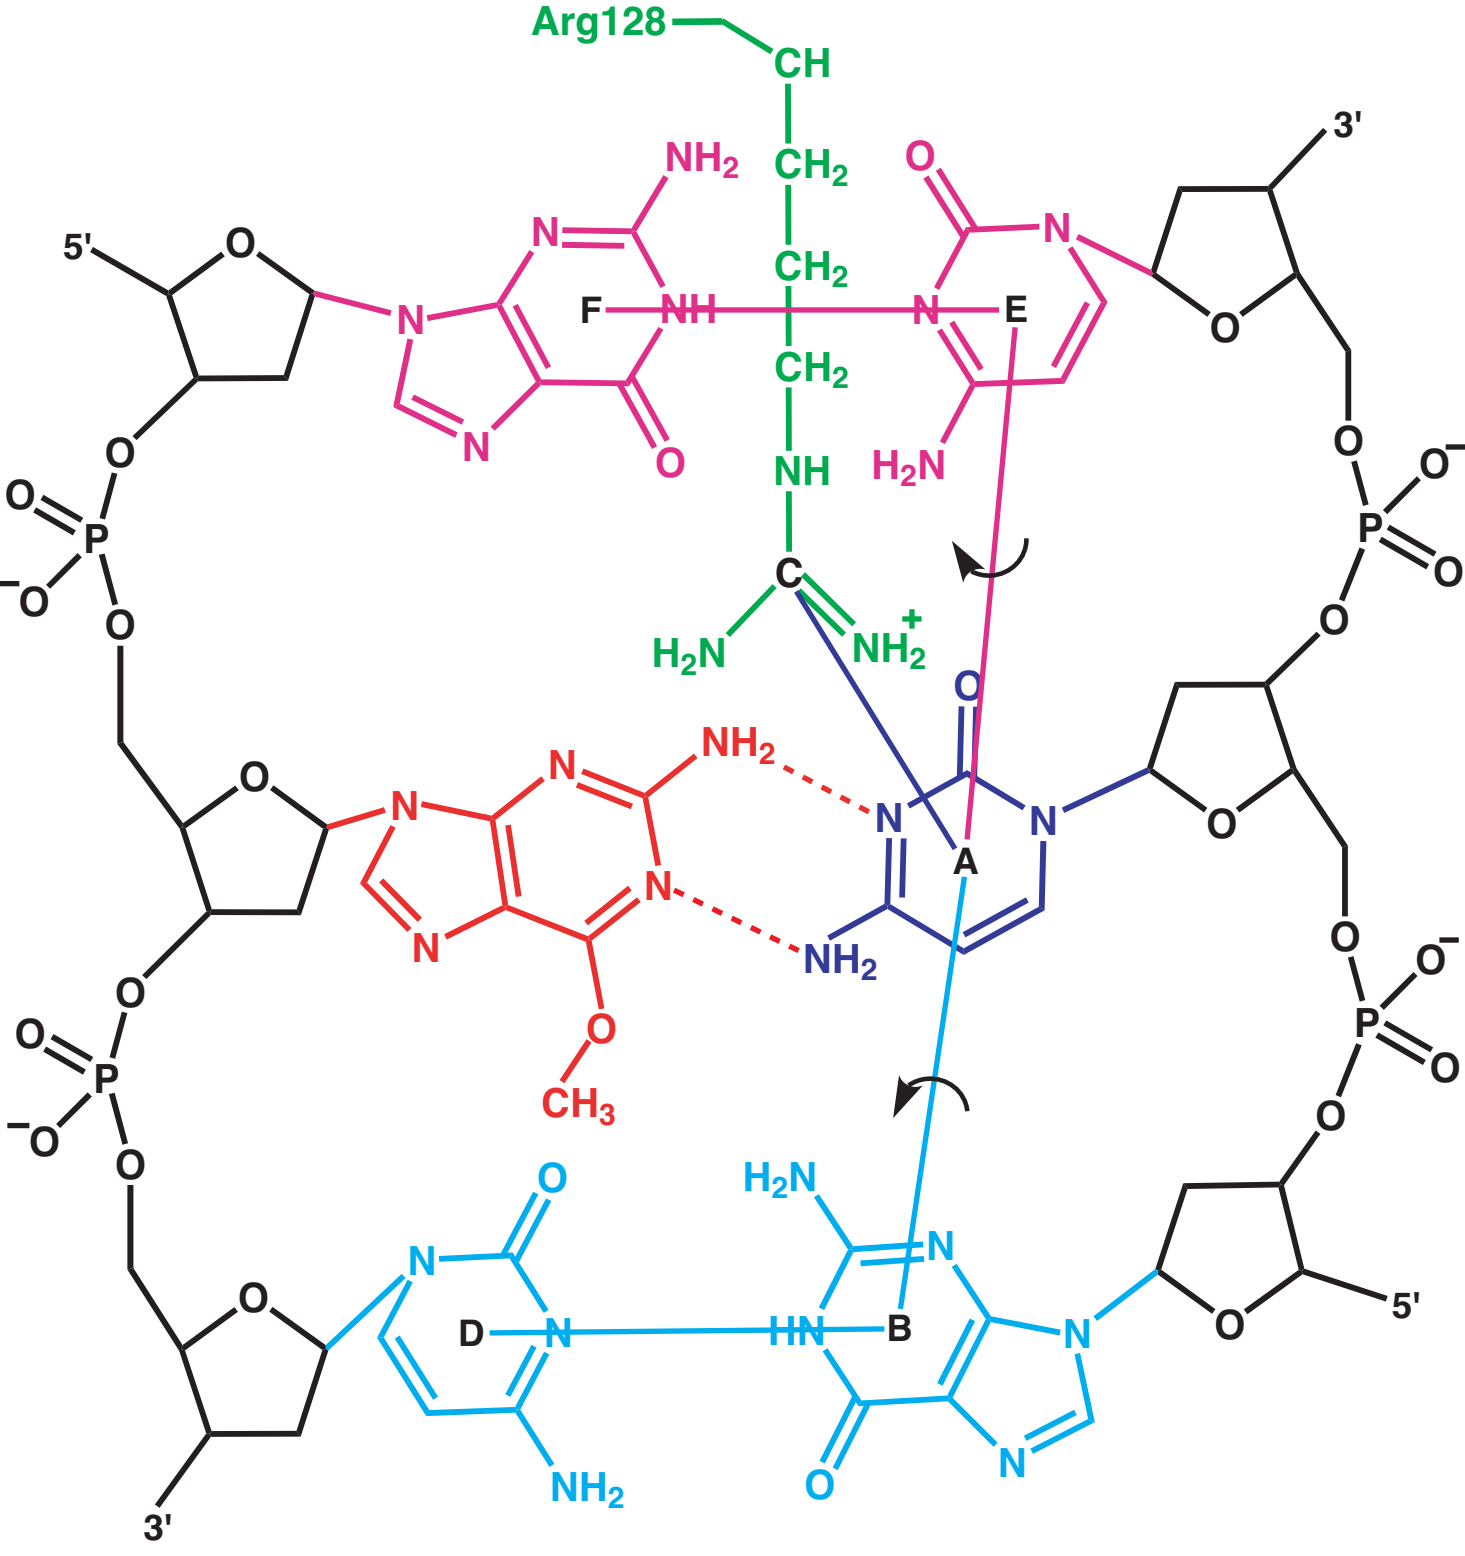

Supplement: pnas_0708058105_8.pdf [file pnas_0708058105_8.pdf]

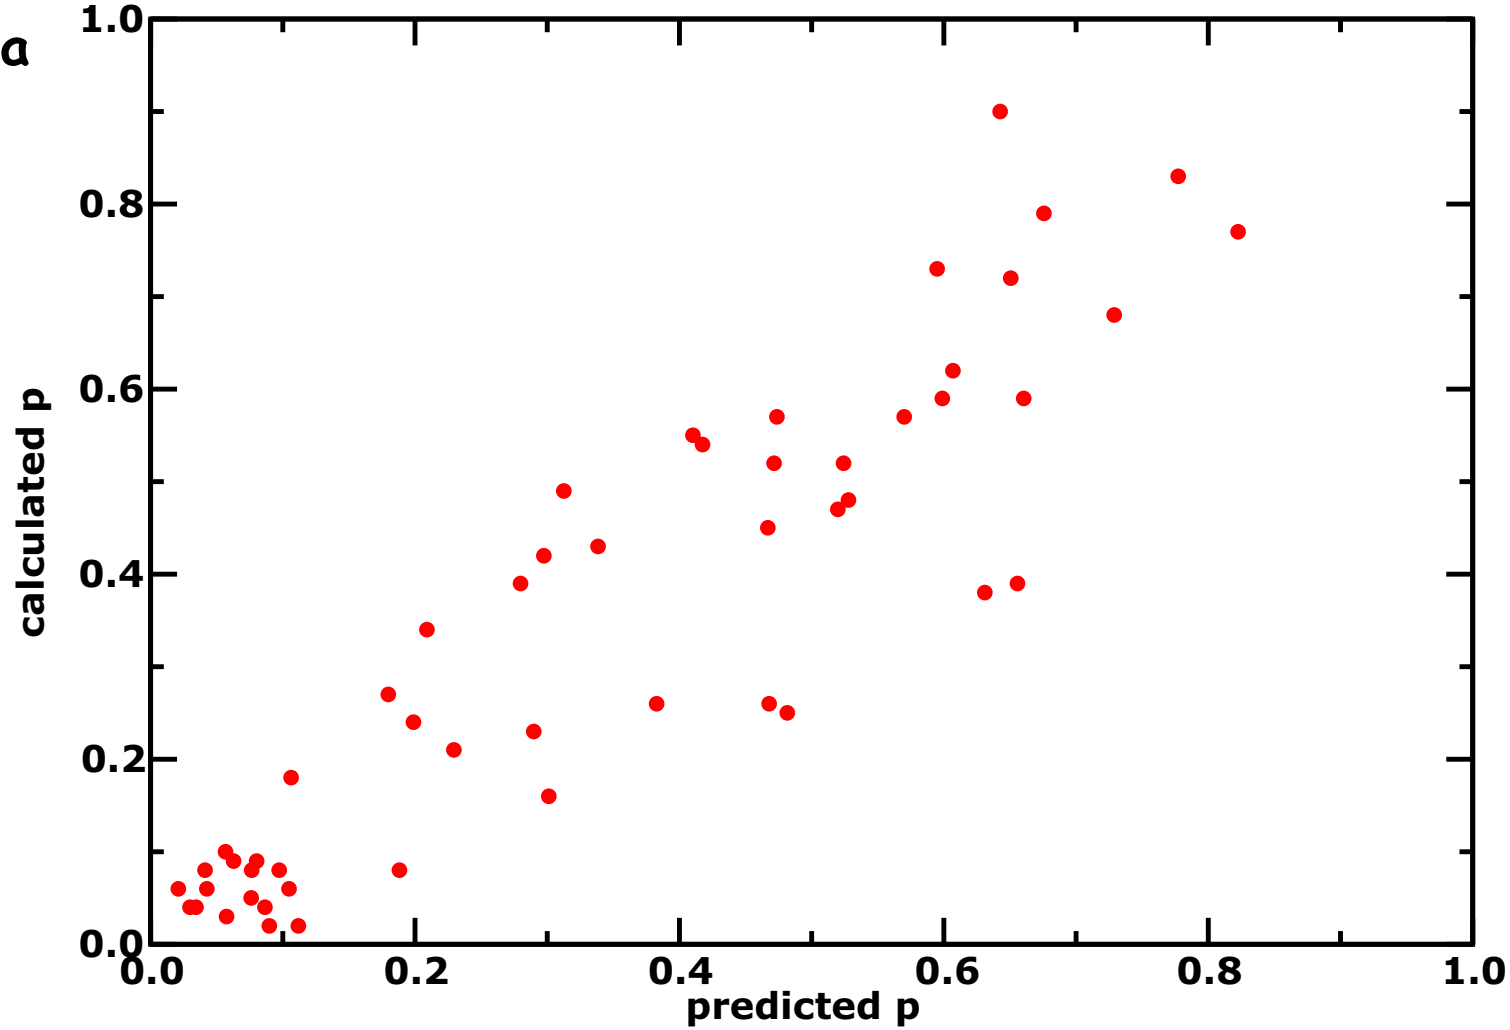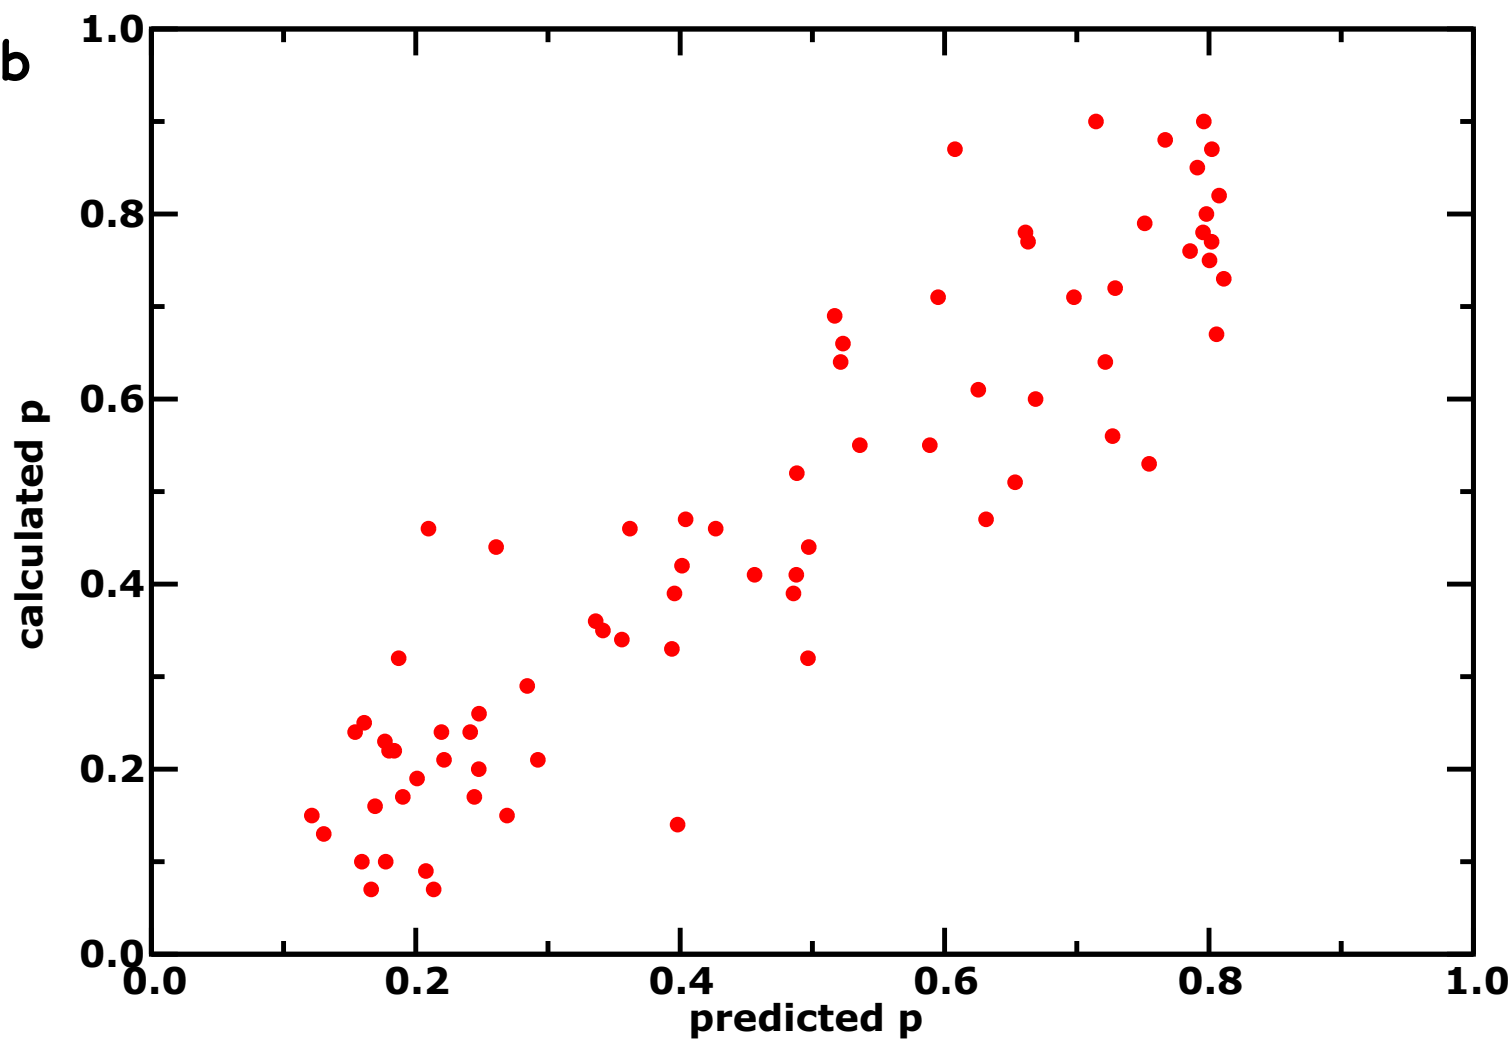

Supplement: pnas_0708058105_9.pdf [file pnas_0708058105_9.pdf]
